# Supplementary material for: PRDM10 directs FLCN expression in a novel disorder overlapping with Birt–Hogg–Dubé syndrome and familial lipomatosis
Source: PubMed Central journal article supplement (PMC10026250; doi:10.1093/hmg/ddac288), 2022-11-28
Supplement: supplemental_figures_ddac288.pdf [file supplemental_figures_ddac288.pdf]

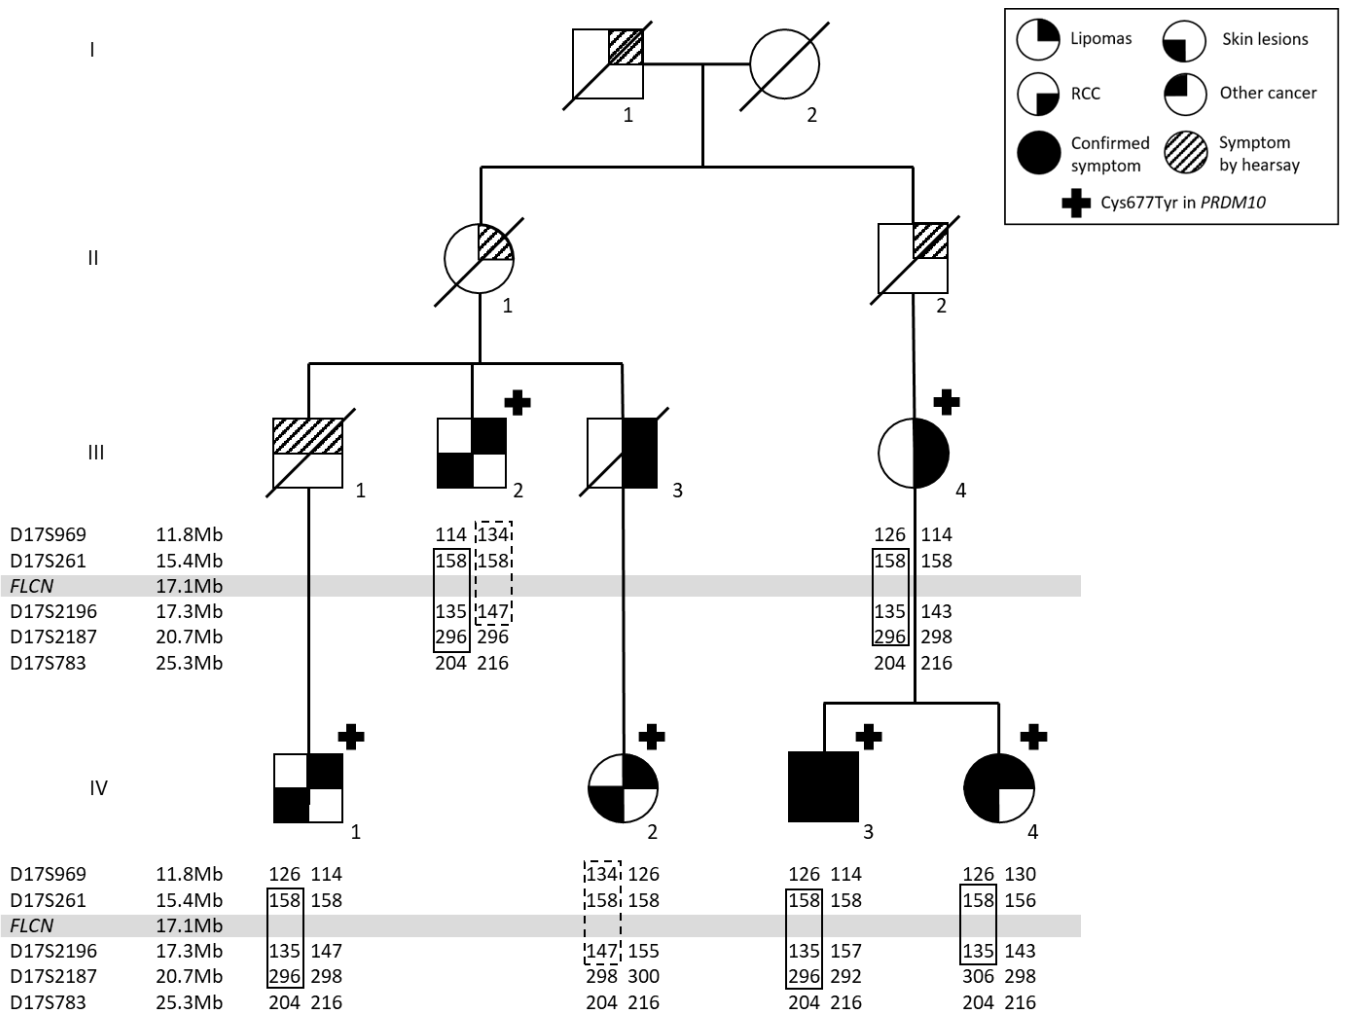

**Supplementary figure 1. Analysis of microsatellite markers flanking *FLCN*.** Depicted the pedigree in which all affected individuals were genotyped for five microsatellite markers surrounding *FLCN*. Common haplotypes are indicated, (marker) locations are given in Mb on Hg19.

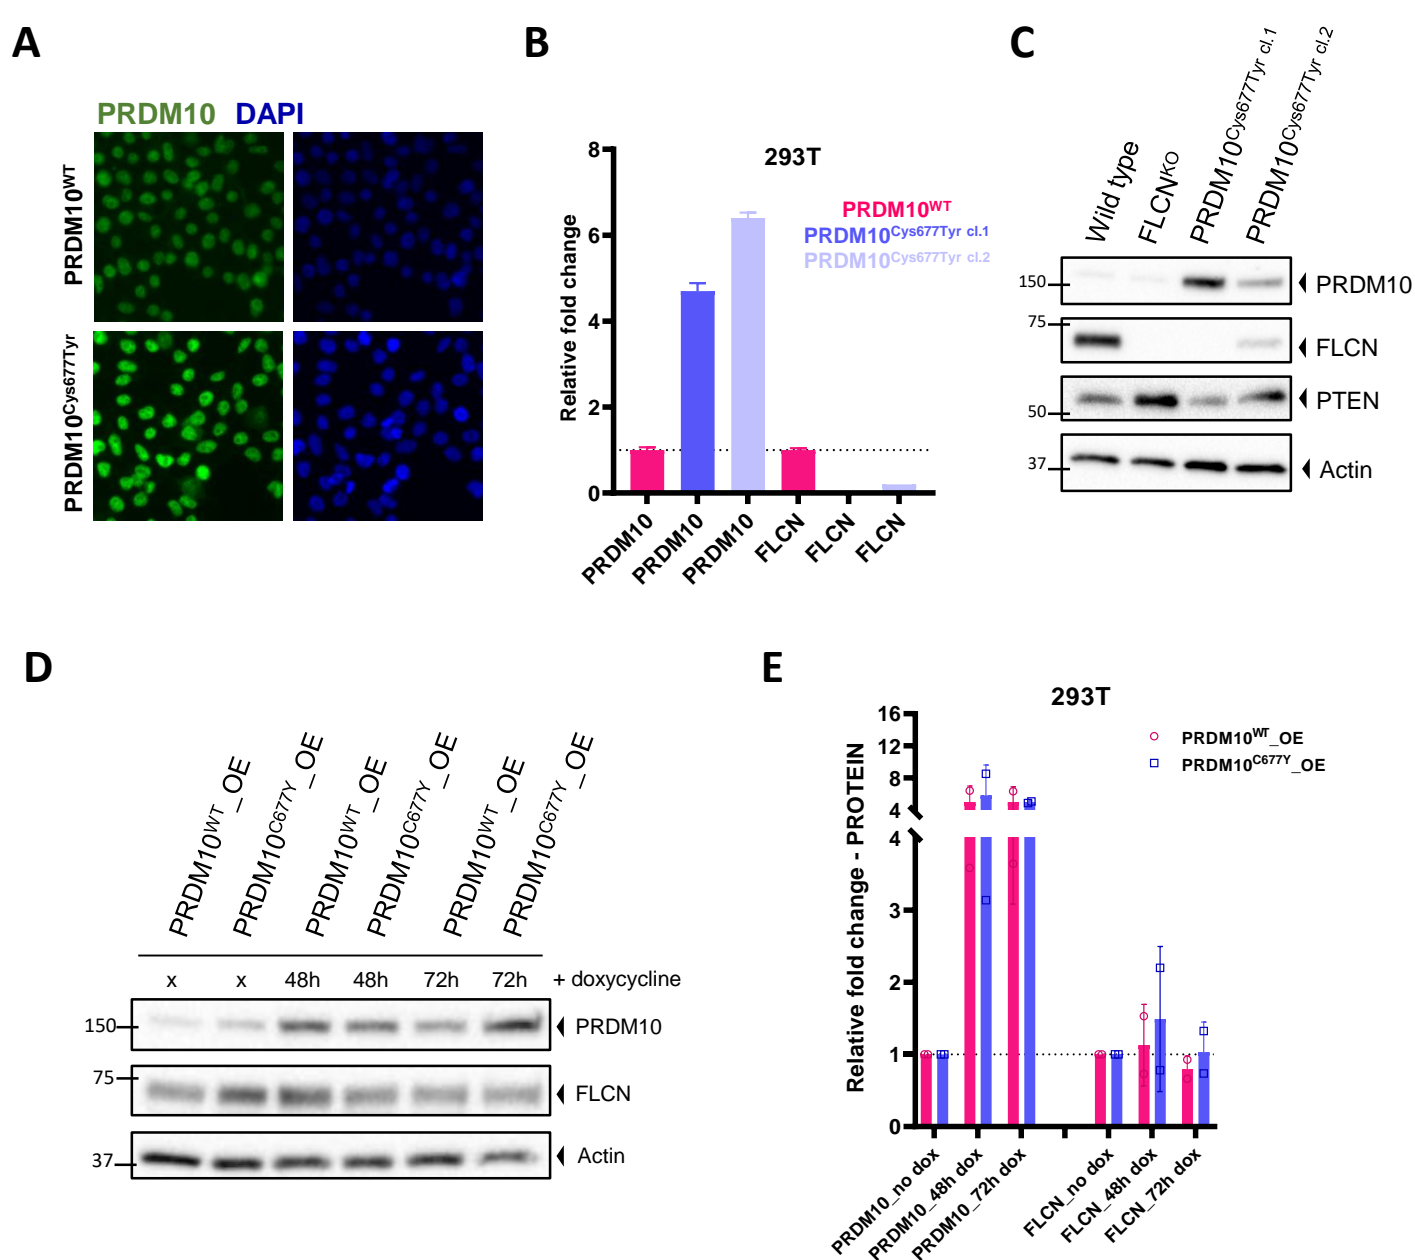

**Supplementary figure 2. Cellular localization of PRDM10 and FLCN expression changes in PRDM10<sup>Cys677Tyr</sup> cells.**

**A.** Immunofluorescent staining of PRDM10 shows that PRDM10<sup>Cys677Tyr</sup> and wild type PRDM10 both co-localize with nuclear DAPI signal. **B.** qPCR shows down regulation of FLCN expression and an increase of PRDM10 expression upon endogenous PRDM10<sup>Cys677Tyr</sup> in two independent 293T cell line clones. **C.** Western blot shows a decrease of FLCN protein levels and an increase of PRDM10 protein levels in two independent PRDM10<sup>Cys677Tyr</sup> cell line clones, as compared to wild type (WT). No difference in PTEN expression was observed upon introduction of PRDM10<sup>Cys677Tyr</sup>. FLCN<sup>KO</sup> 293T cells were taken along as control for absence of FLCN expression and actin was used as a loading control. **D.** Western blot (n=2) shows that the slight decrease of FLCN mRNA upon inducible overexpression (OE) of PRDM10<sup>Cys677Tyr</sup>, was not visible at the protein level within 72h. **E.** Quantification of western blot experiments in D (n=2). The relative fold change was calculated based on Actin expression levels.
