# Supplementary material for: PRDM10 directs FLCN expression in a novel disorder overlapping with Birt–Hogg–Dubé syndrome and familial lipomatosis
Source: PubMed Central journal article supplement (PMC10026250; doi:10.1093/hmg/ddac288), 2022-11-28
Supplement: supplemental_tables_final_ddac288.pdf [file supplemental_tables_final_ddac288.pdf]

**Table S1. All shared variants detected by WES, performed for III-2, IV-1 and IV-2.**

| <b>Gene</b>   | <b>Transcript</b> | <b>cDNA</b> | <b>Protein</b> | <b>gnomAD frequency</b> | <b>Considerations</b>                |
|---------------|-------------------|-------------|----------------|-------------------------|--------------------------------------|
| PRSS56        | NM_001195129.1    | c.318G>C    | p.(Val106=)    | 5/73820                 | no predicted effect on splicing      |
| MYO1G         | NM_033054.2       | c.831T>G    | p.(Ala277=)    | 0                       | no predicted effect on splicing      |
| SLC25A16      | NM_152707.3       | c.908G>A    | p.(Gly303Asp)  | 1/250544                | no co-segregation in IV-3            |
| PRDM10        | NM_020228.2       | c.2030G>A   | p.(Cys677Tyr)  | 1/208488                | co-segregation, conserved amino acid |
| SMEK1/PPP4R3A | NM_001284280.1    | c.2426C>T   | p.(Thr809Met)  | 9/282842                | no co-segregation in III-4           |
| CARHSP1       | NM_014316.3       | c.184G>A    | p.(Val62Ile)   | 42/282518               | high frequency in gnomAD             |

**Table S2. Genes analyzed in the hereditary cancer gene panel in patient IV-3**

|         |        |         |         |        |         |        |         |           |
|---------|--------|---------|---------|--------|---------|--------|---------|-----------|
| A2ML1   | CD27   | DNAJC21 | FANCL   | KRAS   | NOP10   | PTPN11 | RPS28   | SPRED1    |
| ACD     | CD70   | EGFR    | FANCM   | LHCGR  | NPM1    | RAD50  | RPS29   | SQSTM1    |
| AIP     | CDC73  | EGLN1   | FAS     | LIG4   | NRAS    | RAD51C | RPS7    | STK11     |
| AKT1    | CDH1   | EGLN2   | FASLG   | LIG4   | NSD1    | RAD51D | RTEL1   | SUFU      |
| ALK     | CDH23  | ELANE   | FBXW7   | LZTR1  | NTHL1   | RAF1   | RUNX1   | TERC      |
| AMH     | CDK4   | ELP1    | FH      | MAD2L2 | PALB2   | RB1    | SAMD9   | TERF2IP   |
| AMHR2   | CDKN1A | EPCAM   | FLCN    | MAP2K1 | PARN    | RECQL4 | SAMD9L  | TERT      |
| ANKRD26 | CDKN1B | ERCC1   | G6PC3   | MAP2K2 | PAX5    | REST   | SBDS    | TG        |
| APC     | CDKN1C | ERCC2   | GALNT12 | MAX    | PDGFB   | RET    | SDHA    | THPO      |
| ARMC5   | CDKN2A | ERCC3   | GATA2   | MCM8   | PDGFRA  | RHBDF2 | SDHAF2  | TINF2     |
| ASXL1   | DKN2B  | ERCC4   | GDNF    | MCM9   | PHOX2B  | RIT1   | SDHB    | TMEM127   |
| ATM     | CDKN2C | ERCC5   | GFI1    | MDH2   | PIK3CA  | RNASEL | SDHC    | TNFRSF11A |
| ATR     | CEBPA  | ERCC6   | GPC3    | MEN1   | PMS2    | RNF43  | SDHD    | TP53      |
| AXIN2   | CHEK2  | ESR2    | GPR161  | MET    | PMS2CL  | RPL11  | SEMA4A  | TRIM28    |
| BAP1    | CREBBP | ETV6    | GREM1   | MITF   | POLD1   | RPL15  | SFTPA1  | TRIM37    |
| BARD1   | CTC1   | EXT1    | GRHL2   | MLH1   | POLE    | RPL18  | SFTPA2  | TRIP13    |
| BLM     | CTLA4  | EXT2    | HAVCR2  | MPL    | POLH    | RPL27  | SH2B3   | TSC1      |
| BMPR1A  | CTNNA1 | EZH2    | HAX1    | MRE11  | POT1    | RPL35A | SH2D1A  | TSC2      |
| BRAF    | CTR9   | FAN1    | HNF1A   | MSH2   | POU6F2  | RPL5   | SHOC2   | USB1      |
| BRCA1   | CYLD   | FANCA   | HOXB13  | MSH3   | PPM1D   | RPS10  | SLX4    | VHL       |
| BRCA2   | DDB2   | FANCB   | IDH1    | MSH6   | PRF1    | RPS15A | SMAD4   | WAS       |
| BRIP1   | DDX11  | FANCC   | IDH2    | MTAP   | PRKAR1A | RPS17  | SMAD9   | WRAP53    |
| BUB1    | DDX41  | FANCD2  | IKZF1   | MUTYH  | PRKN    | RPS19  | SMARCA4 | WRN       |
| BUB1B   | DICER1 | FANCE   | IPMK    | NBN    | PRSS1   | RPS20  | SMARCB1 | WT1       |
| BUB3    | DIS3L2 | FANCF   | TK      | NF1    | PTCH1   | RPS24  | SMARCE1 | XPA       |
| CARD11  | DKC1   | FANCG   | KIF1B   | NF2    | PTCH2   | RPS26  | SOS1    | XPC       |
| CBL     | DLST   | FANCI   | KIT     | NHP2   | PTEN    | RPS27  | SPINK1  |           |

**Table S3. Overlap of gene expression changes upon FLCN loss or PRDM10Cys677Tyr induction in RPTECs as indicated in figure 4F.**  
Asterisks indicate genes of potential interest overlapping between FLCN<sup>KO</sup> and PRDM10Cys677Tyr cell lines.

| UP (n=446) |          |          |         |              | DOWN(n=473) |           |           |               |           |
|------------|----------|----------|---------|--------------|-------------|-----------|-----------|---------------|-----------|
| ACP5*      | ENPP1    | GLYATL2  | CENPN   | TIGD6        | CDH1*       | SERPING1  | SLC30A2   | SEPP1         | OSBPL10   |
| NPR1       | ARHGEF6  | RACGAP1  | E2F8    | ZNF367       | KCNJ1       | FOLR1     | DNAH5     | KSR1          | CERK      |
| ATP6V0D2   | THSD1    | SNCG     | TUBA1C  | CALB2        | SLC3A1      | IGSF10    | PNMAL1    | ARID5B        | MIR3936   |
| ALDH1A3    | FANCI    | NCAPG2   | CCNE2   | NT5DC2       | CDH3*       | TESC      | AMBP      | SLC17A1       | MACC1     |
| HS3ST3A1   | TRPC4    | LIG1     | RIMS2   | IGFBP6       | MUC1        | ASS1      | LRRC49    | GJB1          | LACTB2    |
| SLC37A2    | MEIS2    | ZNF219   | KCNT2   | RNASEH2A     | FILIP1L     | SLITRK2   | RASSF10   | CDHR1         | ELMO2     |
| PREX1      | CATSPER1 | MMP16    | ANXA6   | SEC24D       | AIF1L       | KCNH3     | LOC647859 | CAMSAP3       | CASC1     |
| SRPX       | CCND1*   | TRAM2    | BRIP1   | FAM72A       | BCAM        | DNER      | FAM84A    | BBOX1         | FAM13B    |
| TNFAIP8L3  | ADRA1B   | MCM4     | ABAT    | KIF14        | PDK4        | TSPAN1    | TRIM17    | SYT16         | OSMR      |
| SIGLEC15   | FAM115C  | C11orf82 | CEP78   | SIX1         | CMTM4       | CEACAM19  | CACNA1H   | RINL          | ATP8A1    |
| PTGIS      | FBN2     | BRCA2    | FAM72D  | MCM10        | ABCB1       | BCL3      | RNF152    | APBB1IP       | C1orf186  |
| PDPN       | MAPRE2   | SPTBN4   | NOG     | LYPD1        | PTH1R       | SERPINF2  | DEPTOR    | INTS10        | CHCHD10   |
| ANPEP      | RAD51AP1 | AURKA    | TTK     | KIF2C        | TFCP2L1     | ADH6      | NHLRC4    | SPRY4         | C2CD4B    |
| NOS1       | PITPNM3  | SH3BGRL3 | CDCA2   | SMAGP        | TMPRSS4     | SLC44A3   | DNAJB13   | SLC44A2       | LINC00488 |
| NID1       | KCNK6    | PCDHGC3  | KCNQ5   | C17orf53     | ERBB4       | ADAMTS9   | FAM189A1  | SERPINA5      | BHLHE40   |
| CPEB1      | GOLGA7B  | ABCA13   | FAM72B  | SMG9         | TMEM37      | SCN7A     | IVNS1ABP  | AQP3          | TNFSF10   |
| CNIH3      | CD276    | AMTN     | PGM5P2  | CENPO        | SHROOM2     | PDE7B     | COL28A1   | NCOA7         | CASR      |
| RGL1       | C7orf58  | TUBB     | AP1S1   | CENPF        | LOC90246    | LOC723809 | GABARAPL1 | KLHDC2        | PKP4      |
| DAAM2      | KIF18A   | CFL2     | MKI67   | LOC730101    | CCL2*       | TNFAIP2   | HS6ST1    | KCNQ1OT1      | FGFR2     |
| CTSL2      | FBLN7    | FAM114A1 | DYNC1I1 | PRC1         | PHACTR3     | C3orf25   | LTB       | RPS6KL1       | RERG      |
| C11orf41   | CD97     | TYMS     | CDCA8   | NUF2         | MECOM       | WWC1      | VWA7      | DKFZP586I1420 | ZNF331    |
| MLPH       | CDC6     | STK10    | KIF23   | MPV17        | AFAP1       | EFHC2     | PTPN14    | PID1          | TSNAXIP1  |
| MDGA1      | CYBRD1   | MAP6     | KRT79   | LOC100505702 | KCNIP4      | LPHN1     | DDX5      | CCDC40        | IQCE      |
| ZNF114     | CDC45    | CHEK1    | ATG16L1 | PDZD4        | DOK5        | GABRP     | PABPC4L   | SPP1          | TMEM176B  |
| LCP1       | VWDE     | FAM111B  | CDCA3   | EPB41L4A     | CASZ1       | CLDN2     | AMIGO1    | SAT1          | LRP6      |

|              |           |          |              |              |           |              |           |              |              |
|--------------|-----------|----------|--------------|--------------|-----------|--------------|-----------|--------------|--------------|
| PLAT         | LRP4      | FOXP2    | XRCC2        | ACOT11       | TSPAN8    | HUNK         | SGK223    | C1orf226     | GNE          |
| KIAA1211     | SLC20A1   | OSBP2    | MND1         | KLHL4        | EDN1      | PLCB1        | KCNQ1     | TEX2         | DNAI1        |
| CD109        | CD3EAP    | F13A1    | PLOD1        | UST          | SLC12A1   | MAOB         | GRB7      | TRPS1        | EPS8L1       |
| SFTA1P       | VGF       | TUBA1B   | FNDC4        | NEIL3        | AGR2      | LOC100130417 | ZC3H12B   | LOC100507651 | CTSC         |
| SPOCD1       | CCDC15    | CLSPN    | LOC154761    | CENPI        | TC2N      | PKHD1        | LGALS9    | LOC388630    | VAV3         |
| SHOX2        | PPAPDC1A  | FOXM1    | SEMA3E       | CCDC86       | RBBP8     | SFRP1        | NLGN4X    | LRRC48       | NOSTRIN      |
| PCDH7        | BACE2     | CALM1    | FHOD1        | POC1A        | SCNN1A    | TMEM45B      | DCDC5     | RAP1GAP      | CCDC160      |
| GLI2         | CAMK4     | NCAPD2   | ADTRP        | KIF4A        | PCDH1     | RHOB         | C7orf41   | ICOSLG       | HES1         |
| SLC14A1      | LIMA1     | TLR6     | POLE2        | GCAT         | PCDP1     | CDH16        | PDE4D     | TMEM133      | ABCA3        |
| APBA2        | RGS17     | KIAA1462 | GSG2         | BASP1        | TRIB2     | EPB41L4B     | FABP3     | GDF7         | C10orf10     |
| ITGAX        | MLF1IP    | RNF125   | TUBB3        | FAM214B      | C19orf21  | AR           | C10orf107 | GABARAPL3    | TTC28        |
| HS3ST3B1     | HJURP     | HRK      | PKM2         | PTPLA        | LEFTY1    | SUCNR1       | ENTPD2    | SLC29A4      | SRSF5        |
| ECM1         | RASGRF2   | JARID2   | Mar-04       | CCNB2        | EFEMP1    | RORC         | PTGER2    | ACMSD        | MITF         |
| LOC100287314 | COL6A3    | DPF3     | STK32C       | GIN51        | ZPLD1     | TMEM173      | LONRF2    | MAGIX        | PHACTR4      |
| FRMD5        | C10orf114 | PADI1    | GFRA1        | LEF1         | OCLN      | SULT1E1      | TNFRSF11B | RNF19A       | COL18A1      |
| LHFPL2       | C8orf34   | WFDC3    | MAP3K4       | FAM189A2     | TNS1      | PCK1         | B4GALT1   | CCDC107      | CYB561       |
| NGEF         | LAPTM5    | KIF15    | PKMYT1       | ZNF845       | LINC00473 | ADSSL1       | FLRT3     | LNX1         | LOC100129534 |
| CD163L1      | ZIC2      | ANLN     | LOC100128164 | IMPDH1       | NUAK2     | PBLD         | ZNRF3     | RAPGEF3      | IRX3         |
| TNNT1        | ITGA11    | TBX3     | PAQR4        | COL13A1      | PAPLN     | TLE2         | PDE6B     | HS3ST1       | DIP2C        |
| JPH1         | DLX2      | MELK     | PPP1R14B     | SPAG5        | NR1H4     | SEMA6A       | ZNF618    | UBD          | PDGFA        |
| EVI2A        | EXO1      | CCDC69   | NCAPG        | ESPL1        | GPR143    | FAM20A       | CNKS3     | LOC100131089 | PLEKHG1      |
| MTIL         | PMP22     | MME      | GGCT         | SOWAHD       | CHDH      | IFITM1       | SLC6A13   | BSPRY        | MAOA         |
| ABCG2        | TRIP13    | NCAPH    | PLK1         | ARHGAP31     | CDKN1C    | ZNF467       | C10orf108 | SEMA3B       | MIDN         |
| KRT19        | TNFRSF11A | ACOT7    | DACT1        | COTL1        | PCSK6     | FAAH2        | FAM149A   | TPPP         | DZIP1        |
| HHAT         | DCN       | GLI3     | WDR76        | LOC100192378 | SAMD12    | CHL1         | EFNA5     | C12orf39     | BCL2L15      |
| ADAMTS12     | PBK       | GIN52    | TTF2         |              | KCNK5     | ALDH1A2      | MRPL33    | STK17B       | LMBRD1       |
| GPR115       | DSCC1     | MCM2     | STIL         |              | ARHGEF16  | SLC40A1      | TRIB1     | G0S2         | COL24A1      |
| OSBPL1A      | CENPA     | AURKB    | SLC17A7      |              | C21orf62  | RHPN2        | STAT3     | PPP1R13B     | C9orf71      |
| TP73         | FABP5     | STMN1    | LOC100506343 |              | ATP1B1    | SASH1        | RASAL1    | INSR         | NLK          |

|          |          |          |          |  |          |              |              |          |            |
|----------|----------|----------|----------|--|----------|--------------|--------------|----------|------------|
| TMCC3    | TGM5     | FAXC     | CDA      |  | ARHGEF38 | SMTNL2       | LPCAT1       | CXCL3    | PHYHD1     |
| C1orf187 | MEF2C    | CHAF1A   | POLQ     |  | WDR66    | CPAMD8       | ILDR1        | PER2     | AP2A2      |
| BACH2    | LHFP     | FXYD6    | GCNT4    |  | NINL     | IER5L        | PTAFR        | PPP1R3B  | DAG1       |
| ANKH     | SLC43A1  | E2F1     | SKA1     |  | FOSL2    | KCTD1        | DLG3         | FAM154B  | RERE       |
| POSTN    | OXTR     | VIM      | FGF12    |  | CLCN5    | SAMD11       | CHSY1        | ADH1C    | SESTD1     |
| CDCA7L   | BDH1     | CHAF1B   | C6orf115 |  | SOWAHC   | MT1F         | TNFRSF19     | EPAS1    | ATP6V1A    |
| RTN4RL2  | BUB1B    | FAH      | PORCN    |  | ETS2     | LRRRC8B      | RNF208       | HS6ST2   | RCBTB2     |
| APOBEC3B | CCNE1    | ZWINT    | MCC      |  | SUSD4    | LOC100422737 | SMAD6        | CGN      | SPRY2      |
| ANK2     | BLM      | CCNA2    | CDC25C   |  | GLUL     | BCR          | TMPRSS3      | NME9     | FZD4       |
| DTL      | DRAP1    | SGOL1    | CALCR    |  | RNF180   | C1orf201     | CRIM1        | ARHGAP24 | C1orf228   |
| RGS20    | NET1     | LACTB    | FGD3     |  | SERPINA3 | FGL2         | TMEM176A     | ABCA4    | C11orf54   |
| EMR2     | METTL7B  | GPR63    | NDC80    |  | C2CD4A   | THSD7B       | PAPPA2       | COLEC12  | MORN3      |
| FIBCD1   | XYLB     | FAM40B   | FEN1     |  | NR3C2    | UBXN10       | PGBD5        | TLR1     | SST        |
| BCHE     | ADAMTSL1 | SHC4     | SGOL2    |  | MAL      | ZDHHC15      | SLC45A4      | FBXO36   | CCDC64     |
| MPP1     | UHRF1    | TIMELESS | DOCK10   |  | CXCL14   | RHOV         | CDKL1        | TBL1X    | THEM4      |
| VSTM2L   | ORC6     | AP1S2    | FBXO5    |  | CYP26B1  | ZNF204P      | EMID2        | PITPNM1  | MFHAS1     |
| MCF2     | ERCC6L   | RRM1     | ADCY3    |  | AFF1     | HOXD8        | CPT1A        | LYNX1    | KIAA0664L3 |
| MCOLN2   | HLA-DRB1 | CDT1     | WDHD1    |  | RASL11A  | RASD1        | HIP1         | DUSP4    | ACVR1B     |
| C9orf125 | TIAM1    | WDR62    | DPYSL3   |  | IRF2BPL  | DAPK1        | GPC4         | CTAGE4   | TTC40      |
| PTTG1    | NANS     | PADI3    | HMMR     |  | SOX9     | CFI          | ACPP         | NCEH1    | RAB17      |
| PARD6G   | PDE4DIP  | TK1      | KIF11    |  | B3GNT2   | CFB          | MMS22L       | PTGER4   | TRAM1      |
| ZIC5     | BEST3    | RMI2     | MAGI2    |  | MEST     | SLC6A12      | CDC42SE2     | CD7      | LOC402160  |
| PPP1R3C  | ITGA5    | BIRC5    | PRR11    |  | MPZL2    | CXorf26      | ACSM3        | VLDLR    | TCTN1      |
| C19orf33 | NRIP3    | LMNB2    | C1orf21  |  | BZRAP1   | BCRP2        | CSGALNACT1   | RUNDC3B  |            |
| FLI1     | TLR4     | ALOXE3   | HLX      |  | HNF1A    | CLMN         | IFITM2       | EFNA1    |            |
| SPOCK1   | MAD2L1   | RAB7L1   | GRIN2D   |  | CYS1     | KIAA1671     | LOC100507218 | SLC48A1  |            |
| PAX6     | GINS4    | SCN3B    | KPNA2    |  | ABLIM1   | FAM110C      | BCRP3        | HGD      |            |
| TCF4     | RAD51    | ESCO2    | KIFC1    |  | TLR5     | APOL4        | FCGR2A       | COG2     |            |
| LRRRC8E  | COL5A1   | RAD54L   | DLX1     |  | TSPAN7   | ABP1         | NR4A1        | RIC3     |            |

|         |         |           |          |  |          |              |           |         |  |
|---------|---------|-----------|----------|--|----------|--------------|-----------|---------|--|
| LUM     | FXYD5   | SARDH     | DLGAP5   |  | WFDC2    | SLC22A5      | WDR72     | ZBTB46  |  |
| SLC7A8  | MTHFD1  | ARHGAP11A | CENPH    |  | RNF150   | NLGN4Y       | FIBIN     | PHF15   |  |
| RBM20   | SH3KBP1 | APOBEC3C  | SLC28A3  |  | LLGL2    | GPC3         | HAP1      | FOXO1   |  |
| BRCA1   | KCNN4   | BEND6     | AOX1     |  | C1orf106 | KIAA2022     | TNF       | TTC25   |  |
| HMGA1   | GPR85   | E2F2      | KIAA1524 |  | ID4      | LEFTY2       | HIST1H2AC | IFITM3  |  |
| HECW2   | CASC5   | MYBL2     | SMC2     |  | C6orf223 | LOC100302650 | KLHDC7A   | PRUNE2  |  |
| CKAP2L  | LMNB1   | SHCBP1    | CORO2B   |  | KCNK2    | SHISA2       | LRG1      | H3F3B   |  |
| E2F7    | TACC3   | CENPW     | XDH      |  | MGAT4A   | BLNK         | SLC17A3   | FOXJ1   |  |
| UBASH3B | INCENP  | TMEM45A   | PCDH18   |  | ARRDC4   | PLSCR1       | TNS3      | DGCR5   |  |
| EGF     | EFHD2   | TOB2P1    | TCF19    |  | PDZD2    | HAVCR1       | PTGER3    | MED9    |  |
| GPM6A   | NDST3   | BTC       | CEP55    |  | CACNA1D  | TNFSF13      | AKIRIN1   | LZTS1   |  |
| FMOD    | C3orf55 | ST8SIA5   | TUBB2A   |  | PVR      | MARVELD2     | EPCAM     | IQCH    |  |
| AFF3    | TPX2    | MYH16     | DEPDC1B  |  | IPCEF1   | SGK2         | KYNU      | CNTD2   |  |
| BUB1    | TRPM3   | INPP4B    | LRP1     |  | BCL2     | DOC2B        | KCNC4     | SLC16A4 |  |
| PDGFRB* | ORC1    | SKA3      | SHISA4   |  | ITM2A    | ACSL4        | ARL14     | GUCY1A3 |  |
| RAI14   | RAB3B   | SIPA1L1   | DSN1     |  | SOSTDC1  | RSPH1        | INADL     | OBSL1   |  |
